# Supplementary material
Source: publisher figshare collection journal article supplement (https://frontiersin.figshare.com/ndownloader/files/16575728)
Supplement: Supplementary file 1 [file 16575728]

## 1 Supplemental Tables

Table S1. Soil chemical properties in different strips of the tomato field experiment early in the season prior to fertilizer application (April 6, 2016). Data are presented as dry basis means  $\pm$  standard deviation (n=4).

| <b>Component<br/>(ppm)</b>                          | <b>DMC</b>       | <b>DMP</b>      | <b>FWC</b>      | <b>UAN32</b>    | <b>Ø</b>        |
|-----------------------------------------------------|------------------|-----------------|-----------------|-----------------|-----------------|
| <b>Soil pH</b>                                      | 6.7 $\pm$ 0.2    | 6.7 $\pm$ 0.1   | 6.7 $\pm$ 0.2   | 6.7 $\pm$ 0.1   | 6.7 $\pm$ 0.1   |
| <b>EC (mmho <math>\cdot</math> cm<sup>-1</sup>)</b> | 1.5 $\pm$ 0.6    | 1.5 $\pm$ 0.5   | 1.6 $\pm$ 1.0   | 1.3 $\pm$ 0.5   | 1.3 $\pm$ 0.5   |
| <b>Soluble salts</b>                                | 944 $\pm$ 387    | 944 $\pm$ 299   | 1,005 $\pm$ 628 | 842 $\pm$ 317   | 835 $\pm$ 291   |
| <b>NO<sub>3</sub>-N</b>                             | 3.5 $\pm$ 1.3    | 3.3 $\pm$ 0.5   | 2.8 $\pm$ 0.5   | 3.5 $\pm$ 0.6   | 3.0 $\pm$ 0.8   |
| <b>Olsen-P</b>                                      | 10.0 $\pm$ 1.6   | 8.5 $\pm$ 2.4   | 9.5 $\pm$ 2.9   | 10.5 $\pm$ 3.9  | 9.0 $\pm$ 1.4   |
| <b>B</b>                                            | 0.2 $\pm$ 0.0    | 0.3 $\pm$ 0.1   | 0.2 $\pm$ 0.1   | 0.2 $\pm$ 0.1   | 0.2 $\pm$ 0.1   |
| <b>Zn</b>                                           | 0.5 $\pm$ 0.1    | 0.7 $\pm$ 0.3   | 0.6 $\pm$ 0.2   | 0.7 $\pm$ 0.3   | 0.6 $\pm$ 0.3   |
| <b>Fe</b>                                           | 9.9 $\pm$ 5.9    | 6.1 $\pm$ 0.6   | 7.2 $\pm$ 1.3   | 10.1 $\pm$ 3.7  | 7.3 $\pm$ 3.3   |
| <b>Cu</b>                                           | 2.7 $\pm$ 0.3    | 2.8 $\pm$ 0.3   | 2.6 $\pm$ 0.2   | 2.6 $\pm$ 0.4   | 2.6 $\pm$ 0.5   |
| <b>Mn</b>                                           | 8.6 $\pm$ 3.4    | 8.8 $\pm$ 2.3   | 8.6 $\pm$ 4.1   | 9.1 $\pm$ 3.2   | 8.2 $\pm$ 3.7   |
| <b>SO<sub>4</sub><sup>2-</sup></b>                  | 100.8 $\pm$ 12.7 | 106.5 $\pm$ 6.8 | 98.5 $\pm$ 12.8 | 98.8 $\pm$ 13.8 | 94.8 $\pm$ 23.1 |

## 2 Supplemental Figures

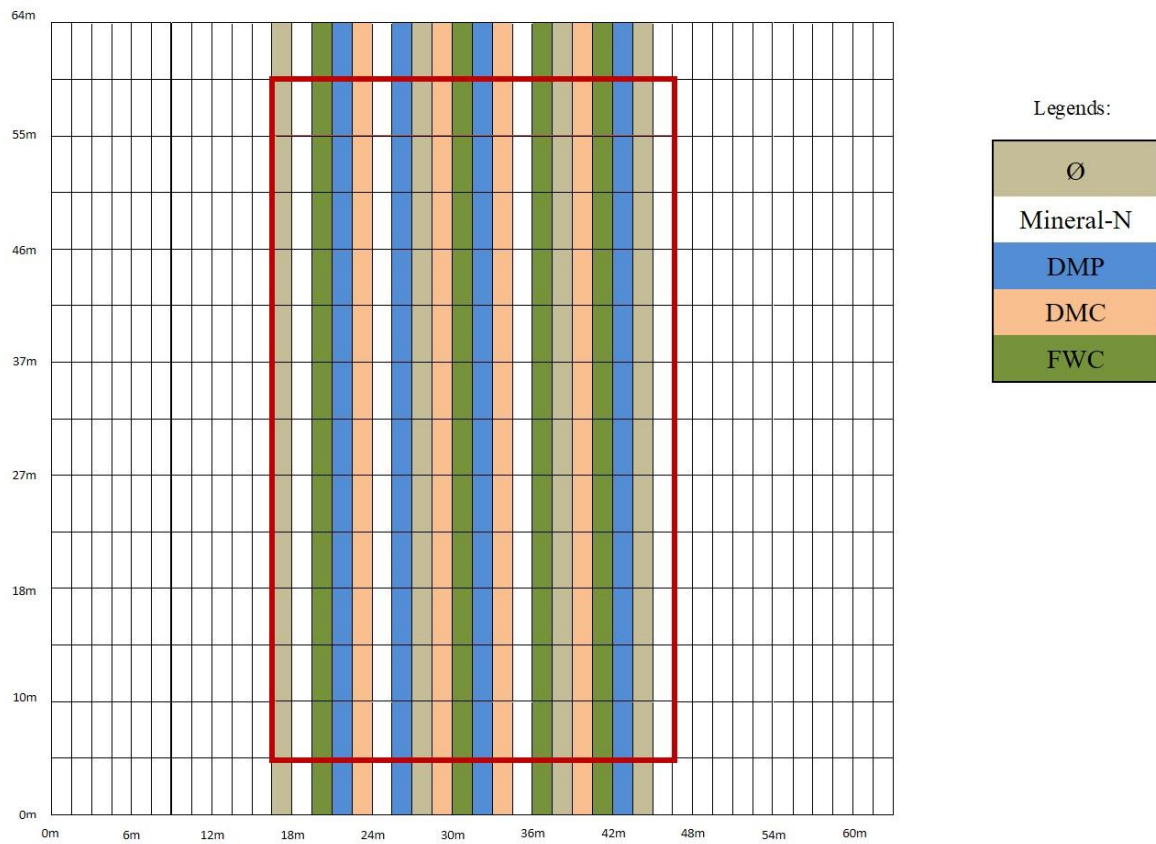

Figure S1. Tomato field experimental design. The red box denotes the harvested area of tomatoes. Each color relates to a different experimental treatment plot. Treatment plots were randomly distributed within four lateral blocks each containing five treatment plots.
